# Supplementary material
Source: ML conference proceedings conference paper supplement (https://openreview.net/forum?id=HYbzWU8s5xc)
Supplement: supplementary_material [file attachment]

# Marginal MAP Estimation for Inverse RL under Occlusion with Observer Noise (Supplementary material)

Prasanth Sengadu Suresh<sup>1</sup>

Prashant Doshi<sup>1</sup>

<sup>1</sup>THINC Lab, Department of Computer Science, University of Georgia, Athens, GA 30606, USA.

## 1 EXTENDED DERIVATION OF MMAP-BIRL REWARD GRADIENTS:

Following the notations provided in the main paper, the likelihood of the visible portions of the trajectories are written as the marginal of the complete trajectory  $X$  by summing out the corresponding hidden portion  $Z$ :

$$\begin{aligned} Pr(\mathcal{Y}|R_\theta) &= \prod_{Y \in \mathcal{Y}} Pr(Y|R_\theta) \\ &= \prod_{Y \in \mathcal{Y}} \sum_{Z \in \mathcal{Z}} Pr(Y, Z|R_\theta) = \prod_{Y \in \mathcal{Y}} \sum_{Z \in \mathcal{Z}} Pr(X|R_\theta). \end{aligned}$$

Here, the parameters  $\theta$  are the maximization variables and the occluded portion  $Z$  of a trajectory comprises the summation variables of the marginal MAP inference. Using the above likelihood function, the MMAP-BIRL problem is more specifically formulated as:

$$R_\theta^* = \arg \max_{\theta \in \Theta} \prod_{Y \in \mathcal{Y}} \sum_{Z \in \mathcal{Z}} Pr(Y, Z|R_\theta) Pr(R_\theta).$$

Let  $Z$  be the collection of the observations in the occluded time steps of  $X$ , and  $Y = X/Z$ . Then,

$$R_\theta^* = \arg \max_{\theta \in \Theta} \prod_{Y \in \mathcal{Y}} \sum_{Z \in \mathcal{Z}} Pr(o_l^1, o_l^2, o_l^3, \dots, o_l^T | R_\theta) \times Pr(R_\theta).$$

The learner's observation  $o_l^t$  is a noisy perception of the expert's state and action at time step  $t$ , and the observations are conditionally independent of each other given the expert's state and action. Therefore, we introduce the state-action pairs in the likelihood function above.

$$Pr(o_l^1, o_l^2, o_l^3, \dots, o_l^T | R_\theta) = \sum_{s^1, a^1, s^2, a^2, \dots, s^T, a^T} Pr(o_l^1, o_l^2, o_l^3, \dots, o_l^T, s^1, a^1, s^2, a^2, \dots, s^T, a^T | R_\theta).$$

For convenience, let  $\tau$  denote the underlying trajectory of state-action pairs,  $\tau = (s^1, a^1, s^2, a^2, \dots, s^T, a^T)$ . Then, we may reformulate the MMAP-BIRL problem as:

$$R_\theta^* = \arg \max_{R_\theta} \prod_{Y \in \mathcal{Y}} \sum_{Z \in \mathcal{Z}} \sum_{\tau \in (|S||A|)^T} Pr(o_l^1, o_l^2, o_l^3, \dots, o_l^T, \tau | R_\theta) Pr(R_\theta).$$

Now the log-posterior can be represented as:

$$L_\theta = L_\theta^{lh} + L_\theta^{pr}. \quad (1)$$

The log forms of the prior and the likelihood function are represented as

$$\begin{aligned} L_\theta^{pr} &= \log Pr(R_\theta) \text{ and } L_\theta^{lh} = \sum_{Y \in \mathcal{Y}} \log \sum_{Z \in \mathcal{Z}} \sum_{\tau \in (|S||A|)^T} \\ &Pr(o_l^1, o_l^2, o_l^3, \dots, o_l^T, \tau | R_\theta). \end{aligned}$$

Consequently, the partial differential of (1) becomes:

$$\frac{\partial L_\theta}{\partial \theta} = \frac{\partial L_\theta^{lh}}{\partial \theta} + \frac{\partial L_\theta^{pr}}{\partial \theta}.$$

### 1.1 DERIVATIVE OF LOG-PRIOR

If we choose the prior  $Pr(\theta; \mu_\theta, \sigma_\theta)$  to be Gaussian, then the distribution is given as:

$$Pr(\theta; \mu_\theta, \sigma_\theta) = \frac{1}{\sqrt{2\pi}\sigma_\theta} e^{-\frac{(\theta - \mu_\theta)^2}{2\sigma_\theta^2}}.$$

where the mean  $\mu_\theta$  and standard deviation  $\sigma_\theta$  may differ between the feature weights. Then, log prior becomes:

$$\begin{aligned} L_\theta^{pr} &= \log \left( \frac{1}{\sqrt{2\pi}\sigma_\theta} e^{-\frac{(\theta - \mu_\theta)^2}{2\sigma_\theta^2}} \right) \\ &= \log \left( \frac{1}{\sqrt{2\pi}\sigma_\theta} \right) + \log \left( e^{-\frac{(\theta - \mu_\theta)^2}{2\sigma_\theta^2}} \right) \\ &= -\log(\sqrt{2\pi}\sigma_\theta) + \log \left( \frac{-(\theta - \mu_\theta)^2}{2\sigma_\theta^2} \right) \end{aligned}$$

Therefore, partial differential of  $L_\theta^{pr}$  becomes:

$$\frac{\partial L_\theta^{pr}}{\partial \theta} = \left( \frac{-(\theta - \mu_\theta)}{\sigma_\theta^2} \right). \quad (2)$$

## 1.2 DERIVATIVE OF LOG-LIKELIHOOD

As explained in the paper, the log-likelihood can be fully written as:

$$L_{\theta}^{lh} = \sum_{Y \in \mathcal{Y}} \log \sum_{Z \in \mathcal{Z}} \sum_{\tau \in (|S||A|)^{\mathcal{T}}} Pr(s^1) \pi(a^1|s^1; \theta) \left( \prod_{t=1}^{\mathcal{T}-1} O_l(s^t, a^t, o_l^t) T(s^t, a^t, s^{t+1}) \pi(a^{t+1}|s^{t+1}; \theta) \right) \times O_l(s^{\mathcal{T}}, a^{\mathcal{T}}, o_l^{\mathcal{T}}). \quad (3)$$

Now, for convenience, let's represent everything within log in (3) as:

$$h_{\theta} = \sum_{Z \in \mathcal{Z}} \sum_{\tau \in (|S||A|)^{\mathcal{T}}} Pr(s^1) \pi(a^1|s^1; \theta) \times \left( \prod_{t=1}^{\mathcal{T}-1} O_l(s^t, a^t, o_l^t) T(s^t, a^t, s^{t+1}) \pi(a^{t+1}|s^{t+1}; \theta) \right) \times O_l(s^{\mathcal{T}}, a^{\mathcal{T}}, o_l^{\mathcal{T}}). \quad (4)$$

Log-likelihood now becomes:

$$L_{\theta}^{lh} = \sum_{Y \in \mathcal{Y}} \log h_{\theta} \implies \frac{\partial L_{\theta}^{lh}}{\partial \theta} = \sum_{Y \in \mathcal{Y}} \frac{1}{h_{\theta}} \frac{\partial h_{\theta}}{\partial \theta}.$$

$$\frac{\partial h_{\theta}}{\partial \theta} = \sum_{Z \in \mathcal{Z}} \sum_{\tau \in (|S||A|)^{\mathcal{T}}} Pr(s^1) \pi(a^1|s^1; \theta) \left( \prod_{t=1}^{\mathcal{T}-1} O_l(s^t, a^t, o_l^t) T(s^t, a^t, s^{t+1}) \frac{\partial}{\partial \theta} \left( \prod_{t=1}^{\mathcal{T}-1} \pi(a^{t+1}|s^{t+1}; \theta) \right) \right) \times O_l(s^{\mathcal{T}}, a^{\mathcal{T}}, o_l^{\mathcal{T}}).$$

Now let's say for convenience  $P_{\theta}^{\pi}$  holds  $\prod_{t=1}^{\mathcal{T}-1} \pi(a^{t+1}|s^{t+1}; \theta)$  term from the above equation:

$$P_{\theta}^{\pi} = \prod_{t=1}^{\mathcal{T}-1} \pi(a^{t+1}|s^{t+1}; \theta) = \pi(a^2|s^2; \theta) \times \pi(a^3|s^3; \theta) \times \pi(a^4|s^4; \theta) \dots \pi(a^{\mathcal{T}-1}|s^{\mathcal{T}-1}; \theta)$$

$$\frac{\partial P_{\theta}^{\pi}}{\partial \theta} = \left( \pi(a^3|s^3; \theta) \times \pi(a^4|s^4; \theta) \dots \pi(a^{\mathcal{T}-1}|s^{\mathcal{T}-1}; \theta) \right) \frac{\partial \pi(a^2|s^2; \theta)}{\partial \theta} + \left( \pi(a^2|s^2; \theta) \times \pi(a^4|s^4; \theta) \dots \pi(a^{\mathcal{T}-1}|s^{\mathcal{T}-1}; \theta) \right) \frac{\partial \pi(a^3|s^3; \theta)}{\partial \theta} + \left( \pi(a^2|s^2; \theta) \times \pi(a^3|s^3; \theta) \dots \pi(a^{\mathcal{T}-1}|s^{\mathcal{T}-1}; \theta) \right) \frac{\partial \pi(a^4|s^4; \theta)}{\partial \theta} + \dots$$

$$\left( \pi(a^2|s^2; \theta) \times \pi(a^3|s^3; \theta) \dots \pi(a^{\mathcal{T}-2}|s^{\mathcal{T}-2}; \theta) \right) \frac{\partial \pi(a^{\mathcal{T}-1}|s^{\mathcal{T}-1}; \theta)}{\partial \theta}$$

$$= \left( \sum_{t=1}^{\mathcal{T}-1} \frac{\partial \pi(a^{t+1}|s^{t+1}; \theta)}{\partial \theta} \prod_{k \neq t} \pi(a^k|s^k; \theta) \right) \quad (5)$$

Partial derivative of the policy  $\pi(a^{t+1}|s^{t+1}; \theta)$  is given as,

$$\frac{\partial \pi(a^{t+1}|s^{t+1}; \theta)}{\partial \theta} = \pi(a^{t+1}|s^{t+1}; \theta) \left( \frac{\beta \partial Q^*(s^{t+1}, a^{t+1}; \theta)}{\partial \theta} - \sum_{a' \in A} \pi(a'|s^{t+1}; \theta) \frac{\beta \partial Q^*(s^{t+1}, a'; \theta)}{\partial \theta} \right)$$

where the partial derivative of the  $Q$ -function can be obtained as:

$$\frac{\partial Q^*(s^{t+1}, a^{t+1}; \theta)}{\partial \theta} = \frac{\partial R_{\theta}(s^{t+1}, a^{t+1})}{\partial \theta} + \gamma \sum_{s' \in S} T(s^{t+1}, a^{t+1}, s') \sum_{a' \in A} \pi(a'|s^{t+1}; \theta) \frac{\partial Q^*(s', a'; \theta)}{\partial \theta}.$$
